# Supplementary material for: Distribution of Bacterial α1,3-Galactosyltransferase Genes in the Human Gut Microbiome
Source: Front Immunol. 2020 Jan 13;10:3000. doi: 10.3389/fimmu.2019.03000 (PMC6970434; doi:10.3389/fimmu.2019.03000)
Supplement: Supplementary Table 1 — List of bacteria harboring α1,3GT genes. When available, the gene name and the KEGG orthology numbers are indicated. [file Table_1.XLSX]

## Sheet: Feuil1
Name of bacteria	Name of gene	Description	Link to sequences
Acidaminococcus intestini	WaaI	(GenBank) Lipopolysaccharide 1,2-glucosyltransferase K03275 UDP-glucose:(glucosyl)LPS alpha-1,3-glucosyltransferase [EC:2.4.1.-]	https://www.genome.jp/dbget-bin/www_bget?ain:Acin_0070			https://www.uniprot.org/uniprot/C0WCJ1
Arsenophonus symbiont of Lipoptena fortisetosa	gspA_1	(GenBank) General stress protein A K03275 UDP-glucose:(glucosyl)LPS alpha-1,3-glucosyltransferase	http://www.genome.jp/dbget-bin/www_bget?asy:AUT07_00127
Atlantibacter hermannii NBRC 105704	RfaI	Lipopolysaccharide 1,3-galactosyltransferase	https://www.uniprot.org/uniprot/H5V3Z9
Azotobacter chroococcum		K03278 UDP-D-galactose:(glucosyl)LPS alpha-1,3-D-galactosyltransferase [EC:2.4.1.44] | (GenBank) Lipopolysaccharide 1,3-galactosyltransferase	https://www.genome.jp/dbget-bin/www_bget?acx:Achr_7000
Brachyspira pilosicoli P43/6/78: BPP43_09675		(GenBank) UDP-galactose-lipooligosaccharide galactosyltransferase	https://www.genome.jp/dbget-bin/www_bget?bpip:BPP43_09675
Brachyspira pilosicoli WESB_2422		UDP-galactose-lipooligosaccharide galactosyltransferase	https://www.genome.jp/dbget-bin/www_bget?bpw:WESB_2422
Brenneria goodwinii	WaaO	(GenBank) lipopolysaccharide 1,3-galactosyltransferase	https://www.genome.jp/dbget-bin/www_bget?bgj:AWC36_19620
Campylobacter coli		(GenBank) lipopolysaccharide 1,3-galactosyltransferase	https://www.genome.jp/dbget-bin/www_bget?ccc:G157_03250
Campylobacter lanienae	gspA	Lipopolysaccharide 1,3-galactosyltransferase	https://www.uniprot.org/uniprot/A0A381D6W6
Campylobacter lari	gspA_1	Lipopolysaccharide 1,3-galactosyltransferase	https://www.uniprot.org/uniprot/A0A381DFX9
Campylobacter upsaliensis	gspA_1	Lipopolysaccharide 1,3-galactosyltransferase	https://www.uniprot.org/uniprot/A0A381EH44
Candidatus Arsenophonus lipoptenae	gspA_1	(GenBank) General stress protein A K03275 UDP-glucose:(glucosyl)LPS alpha-1,3-glucosyltransferase [EC:2.4.1.-]	https://www.genome.jp/dbget-bin/www_bget?asy:AUT07_00127
Candidatus Regiella insecticola LSR1	RfaI	Putative lipopolysaccharide 1,3-galactosyltransferase	https://www.uniprot.org/uniprot/E0WUS3
Cedecea neteri		(GenBank) glycosyl transferase family 8 K03275 UDP-glucose:(glucosyl)LPS	http://www.genome.jp/dbget-bin/www_bget?cem:LH23_05595
Cedecea neteri SSMD04		(GenBank) glycosyl transferase family 8 K03275 UDP-glucose:(glucosyl)LPS	http://www.genome.jp/dbget-bin/www_bget?cnt:JT31_12160
Centipeda periodontii DSM 2778	RfaI	Lipopolysaccharide 3-alpha-galactosyltransferase	https://www.uniprot.org/uniprot/F5RL15
Citrobacter amalonaticus Y19	RfaI	K03278 UDP-D-galactose:(glucosyl)LPS alpha-1,3-D-galactosyltransferase [EC:2.4.1.44] | (GenBank) lipopolysaccharide 1,3-galactosyltransferase	https://www.genome.jp/dbget-bin/www_bget?cama:F384_19595
Citrobacter braakii		(GenBank) lipopolysaccharide 1,3-galactosyltransferase K03275 UDP-glucose:(glucosyl)LPS	http://www.genome.jp/dbget-bin/www_bget?cbra:A6J81_17810
Citrobacter farmeri		K03278 UDP-D-galactose:(glucosyl)LPS alpha-1,3-D-galactosyltransferase [EC:2.4.1.44] | (GenBank) lipopolysaccharide 3-alpha-galactosyltransferase	https://www.genome.jp/dbget-bin/www_bget?cfar:CI104_00570
Citrobacter freundii	RfaI	Lipopolysaccharide 1,3-galactosyltransferase	https://www.uniprot.org/uniprot/A0A241Q585
Citrobacter rodentium	rfaI	(GenBank) UDP-galactose:(glucosyl) LPS alpha-1,3-galactosyltransferase K03275 UDP-glucose:(glucosyl)LPS	http://www.genome.jp/dbget-bin/www_bget?cro:ROD_41901
Citrobacter sp. CFNIH10		K03278 UDP-D-galactose:(glucosyl)LPS alpha-1,3-D-galactosyltransferase [EC:2.4.1.44] | (GenBank) lipopolysaccharide 3-alpha-galactosyltransferase	https://www.genome.jp/dbget-bin/www_bget?cir:C2U53_08990
Citrobacter youngae	RfaI	UDP-galactose:(Glucosyl) LPS alpha-1,3-galactosyltransferase	https://www.uniprot.org/uniprot/A0A381HB42
Collimonas arenae	WaaO	(GenBank) UDP-glucose:(glucosyl)lipopolysaccharide alpha-1,3-glucosyltransferase WaaO	http://www.genome.jp/dbget-bin/www_bget?care:LT85_1187
Collimonas fungivorans	WaaI	(GenBank) Lipopolysaccharide 3-alpha-galactosyltransferase	https://www.genome.jp/dbget-bin/www_bget?cfu:CFU_1045
Collimonas pratensis CPter91_1145		(GenBank) glycosyl transferase 8 C-terminal family protein K03275 UDP-glucose:(glucosyl)LPS	http://www.genome.jp/dbget-bin/www_bget?cpra:CPter91_1145
Collimonas pratensis CPter91_1143		(GenBank) glycosyl transferase 8 C-terminal family protein K03275 UDP-glucose:(glucosyl)LPS	http://www.genome.jp/dbget-bin/www_bget?cpra:CPter91_1143
Cupriavidus necator NH9	WaaO	(GenBank) UDP-glucose--(glucosyl) LPS alpha 1,3-glucosyltransferase WaaO K03275 UDP-glucose:(glucosyl)LPS alpha-1,3-glucosyltransferase [EC:2.4.1.-]	https://www.genome.jp/dbget-bin/www_bget?cuh:BJN34_04555
Cupriavidus sp. NH9	WaaO	(GenBank) UDP-glucose--(glucosyl) LPS alpha 1,3-glucosyltransferase WaaO K03275 UDP-glucose:(glucosyl)LPS	http://www.genome.jp/dbget-bin/www_bget?cuh:BJN34_04555
Cyclobacterium amurskyense		(GenBank) hypothetical protein K03275 UDP-glucose:(glucosyl)LPS	http://www.genome.jp/dbget-bin/www_bget?camu:CA2015_3240
Ensifer adhaerens Casida A		(GenBank) hypothetical protein K03275 UDP-glucose:(glucosyl)LPS	http://www.genome.jp/dbget-bin/www_bget?eah:FA04_03150
Enterobacteriaceae bacterium FGI 57	WaaO	K03278 UDP-D-galactose:(glucosyl)LPS alpha-1,3-D-galactosyltransferase [EC:2.4.1.44] | (GenBank) LPS:glycosyltransferase	https://www.genome.jp/dbget-bin/www_bget?ebf:D782_0097
Erwinia billingiae		(GenBank) Lipopolysaccharide 1,3-galactosyltransferase K03275 UDP-glucose:(glucosyl)LPS	http://www.genome.jp/dbget-bin/www_bget?ebi:EbC_pEb10200120
Escherichia albertii		(GenBank) lipopolysaccharide 1,3-galactosyltransferase K03275 UDP-glucose:(glucosyl)LPS	http://www.genome.jp/dbget-bin/www_bget?eal:EAKF1_ch2315
Escherichia coli 55989 (EAEC)	rfaI	(GenBank) Lipopolysaccharide 1,3-galactosyltransferase K03275 UDP-glucose:(glucosyl)LPS	http://www.genome.jp/dbget-bin/www_bget?eck:EC55989_4093
Escherichia coli ABU 83972		(GenBank) lipopolysaccharide 1,3-galactosyltransferase K03275 UDP-glucose:(glucosyl)LPS	http://www.genome.jp/dbget-bin/www_bget?eab:ECABU_c40680
Escherichia coli APEC O1 (APEC)	rafI	(GenBank) lipopolysaccharide 1,3-galactosyltransferase K03275 UDP-glucose:(glucosyl)LPS	http://www.genome.jp/dbget-bin/www_bget?ecv:APECO1_2829
Escherichia coli ATCC 8739		(GenBank) Lipopolysaccharide 3-alpha-galactosyltransferase K03275 UDP-glucose:(glucosyl)LPS	http://www.genome.jp/dbget-bin/www_bget?ecl:EcolC_0082
Escherichia coli B REL606	waaO	(GenBank) UDP-glucose:(Glucosyl) LPS alpha1,3-glucosyltransferase WaaO K03275 UDP-glucose:(glucosyl)LPS	http://www.genome.jp/dbget-bin/www_bget?ebr:ECB_03486
Escherichia coli BL21(DE3)	waaO	(GenBank) UDP-glucose:(Glucosyl) LPS alpha1,3-glucosyltransferase WaaO K03275 UDP-glucose:(glucosyl)LPS	http://www.genome.jp/dbget-bin/www_bget?ebl:ECD_03486
Escherichia coli BL21(DE3)	ybl158	(GenBank) ybl158 K03275 UDP-glucose:(glucosyl)LPS	http://www.genome.jp/dbget-bin/www_bget?ebe:B21_03438
Escherichia coli BL21-Gold(DE3)pLysS AG		(GenBank) Lipopolysaccharide 3-alpha-galactosyltransferase K03275 UDP-glucose:(glucosyl)LPS	http://www.genome.jp/dbget-bin/www_bget?ebd:ECBD_0097
Escherichia coli BW2952	rfaI	(GenBank) UDP-D-galactose:(glucosyl)lipopolysaccharide-alpha-1,3-D-galactosyltransferase K03275 UDP-glucose:(glucosyl)LPS	http://www.genome.jp/dbget-bin/www_bget?ebw:BWG_3318
Escherichia coli clone D i14	rfaI	(GenBank) lipopolysaccharide 1,3-galactosyltransferase K03275 UDP-glucose:(glucosyl)LPS	http://www.genome.jp/dbget-bin/www_bget?elc:i14_4115
Escherichia coli clone D i2	rfaI	(GenBank) lipopolysaccharide 1,3-galactosyltransferase K03275 UDP-glucose:(glucosyl)LPS	http://www.genome.jp/dbget-bin/www_bget?eld:i02_4115
Escherichia coli DH1	rfaI	(GenBank) UDP-D-galactose:(glucosyl)lipopolysaccharide-alpha-1,3-D-galactosyltransferase K03275 UDP-glucose:(glucosyl)LPS	http://www.genome.jp/dbget-bin/www_bget?edj:ECDH1ME8569_3512
Escherichia coli DH1		(GenBank) Lipopolysaccharide 3-alpha-galactosyltransferase K03275 UDP-glucose:(glucosyl)LPS	http://www.genome.jp/dbget-bin/www_bget?edh:EcDH1_0078
Escherichia coli E24377A (ETEC)	rfaI	(GenBank) lipopolysaccharide 1,3-galactosyltransferase K03275 UDP-glucose:(glucosyl)LPS	http://www.genome.jp/dbget-bin/www_bget?ecw:EcE24377A_4130
Escherichia coli IHE3034	rfaI	(GenBank) lipopolysaccharide 1,3-galactosyltransferase K03275 UDP-glucose:(glucosyl)LPS	http://www.genome.jp/dbget-bin/www_bget?eih:ECOK1_4070
Escherichia coli JJ1886		(GenBank) lipopolysaccharide 1,3-galactosyltransferase K03275 UDP-glucose:(glucosyl)LPS	http://www.genome.jp/dbget-bin/www_bget?ecoj:P423_20145
Escherichia coli K-12 DH10B	rfaI	(GenBank) UDP-D-galactose:(glucosyl)lipopolysaccharide-alpha-1,3-D-galactosyltransferase K03275 UDP-glucose:(glucosyl)LPS	http://www.genome.jp/dbget-bin/www_bget?ecd:ECDH10B_3809
Escherichia coli K-12 MDS42	rfaI	(GenBank) UDP-D-galactose:(glucosyl)lipopolysaccharide-alpha-1,3-D-galactosyltransferase K03275 UDP-glucose:(glucosyl)LPS	http://www.genome.jp/dbget-bin/www_bget?ecok:ECMDS42_3061
Escherichia coli K-12 MG1655	waaO	(RefSeq) UDP-D-galactose:(glucosyl)lipopolysaccharide-alpha-1,3-D-galactosyltransferase K03275 UDP-glucose:(glucosyl)LPS	http://www.genome.jp/dbget-bin/www_bget?eco:b3627
Escherichia coli K-12 W3110	rfaI	(GenBank) UDP-D-galactose:(glucosyl)lipopolysaccharide-alpha-1,3-D-galactosyltransferase K03275 UDP-glucose:(glucosyl)LPS	http://www.genome.jp/dbget-bin/www_bget?ecj:JW3602
Escherichia coli KO11FL	rfaI	(GenBank) lipopolysaccharide 1,3-galactosyltransferase K03275 UDP-glucose:(glucosyl)LPS	http://www.genome.jp/dbget-bin/www_bget?ekf:KO11_04555
Escherichia coli KO11FL		(GenBank) Lipopolysaccharide 3-alpha-galactosyltransferase EKO11_0094	http://www.genome.jp/dbget-bin/www_bget?eko:EKO11_0094
Escherichia coli LF82		(GenBank) Lipopolysaccharide1,3-galactosyltransferase (EC 24144) K03275 UDP-glucose:(glucosyl)LPS	http://www.genome.jp/dbget-bin/www_bget?elf:LF82_563
Escherichia coli LY180		(GenBank) lipopolysaccharide 1,3-galactosyltransferase K03275 UDP-glucose:(glucosyl)LPS	http://www.genome.jp/dbget-bin/www_bget?ecol:LY180_18690
Escherichia coli O103:H2 12009 (EHEC)	WaaI	(GenBank) UDP-D-galactose:(glucosyl) lipopolysaccharide-alpha-1,3-D-galactosyltransferase WaaI K03275 UDP-glucose:(glucosyl)LPS	http://www.genome.jp/dbget-bin/www_bget?eoh:ECO103_4553
Escherichia coli O104:H4 2009EL-2050		(GenBank) lipopolysaccharide 1,3-galactosyltransferase K03275 UDP-glucose:(glucosyl)LPS	http://www.genome.jp/dbget-bin/www_bget?esm:O3M_00725
Escherichia coli O104:H4 2009EL-2071		(GenBank) lipopolysaccharide 1,3-galactosyltransferase K03275 UDP-glucose:(glucosyl)LPS	http://www.genome.jp/dbget-bin/www_bget?eso:O3O_24975
Escherichia coli O104:H4 2011C-3493		(RefSeq) lipopolysaccharide 1,3-galactosyltransferase K03275 UDP-glucose:(glucosyl)LPS	http://www.genome.jp/dbget-bin/www_bget?esl:O3K_00695
Escherichia coli O111:H- 11128 (EHEC)	WaaI	(GenBank) UDP-D-galactose:(glucosyl) lipopolysaccharide-alpha-1,3-D-galactosyltransferase WaaI K03275 UDP-glucose:(glucosyl)LPS	http://www.genome.jp/dbget-bin/www_bget?eoi:ECO111_4451
Escherichia coli O127:H6 E2348/69 (EPEC)	rfaI	(GenBank) UDP-D-galactose: (glucosyl) lipopolysaccharide-alpha-1,3-D-galactosyltransferase K03275 UDP-glucose:(glucosyl)LPS	http://www.genome.jp/dbget-bin/www_bget?ecg:E2348C_3875
Escherichia coli O139:H28 E24377A (ETEC)	rfaI	(GenBank) lipopolysaccharide 1,3-galactosyltransferase K03275 UDP-glucose:(glucosyl)LPS alpha-1,3-glucosyltransferase [EC:2.4.1.-]	https://www.genome.jp/dbget-bin/www_bget?ecw:EcE24377A_4130
Escherichia coli O145:H28 RM13514 (EHEC)	waaO	(GenBank) UDP-glucose:(glucosyl)lipopolysaccharide alpha-1,3-glucosyltransferase WaaO K03275 UDP-glucose:(glucosyl)LPS	http://www.genome.jp/dbget-bin/www_bget?ecoo:ECRM13514_4618
Escherichia coli O145:H28 RM13516 (EHEC)	waaO	(GenBank) UDP-glucose:(glucosyl)lipopolysaccharide alpha-1,3-glucosyltransferase WaaO K03275 UDP-glucose:(glucosyl)LPS	http://www.genome.jp/dbget-bin/www_bget?ecoh:ECRM13516_4416
Escherichia coli O150:H5 SE15 (commensal)		(GenBank) UDP-D-galactose:(glucosyl)lipopolysaccharide-alpha-1,3-D-galactosyltransferase K03275 UDP-glucose:(glucosyl)LPS	http://www.genome.jp/dbget-bin/www_bget?ese:ECSF_3462
Escherichia coli O152:H28 SE11 (commensal)		(GenBank) UDP-D-galactose:(glucosyl)lipopolysaccharide-alpha-1,3-D-galactosyltransferase K03275 UDP-glucose:(glucosyl)LPS	http://www.genome.jp/dbget-bin/www_bget?ecy:ECSE_3909
Escherichia coli O157:H7 EC4115 (EHEC)		(GenBank) lipopolysaccharide 1,3-galactosyltransferase K03275 UDP-glucose:(glucosyl)LPS	http://www.genome.jp/dbget-bin/www_bget?ecf:ECH74115_4999
Escherichia coli O157:H7 EDL933 (EHEC)	waaI	(GenBank) putative LPS biosynthesis enzyme K03275 UDP-glucose:(glucosyl)LPS	http://www.genome.jp/dbget-bin/www_bget?ece:Z5053
Escherichia coli O157:H7 Sakai (EHEC)		(RefSeq) UDP-D-galactose:(glucosyl)lipopolysaccharide-alpha-1,3-D-galactosyltransferase K03275 UDP-glucose:(glucosyl)LPS	http://www.genome.jp/dbget-bin/www_bget?ecs:ECs4504
Escherichia coli O157:H7 TW14359 (EHEC)	waaI	(GenBank) putative LPS biosynthesis enzyme K03275 UDP-glucose:(glucosyl)LPS	http://www.genome.jp/dbget-bin/www_bget?etw:ECSP_4623
Escherichia coli O157:H7 Xuzhou21 (EHEC)		(GenBank) UDP-D-galactose:(glucosyl)lipopolysaccharide-alpha-1,3-D-galactosyltransferase K03275 UDP-glucose:(glucosyl)LPS	http://www.genome.jp/dbget-bin/www_bget?elx:CDCO157_4241
Escherichia coli O17:K52:H18 UMN026 (ExPEC)	rfaI	(RefSeq) lipopolysaccharide 1,3-galactosyltransferase K03275 UDP-glucose:(glucosyl)LPS	http://www.genome.jp/dbget-bin/www_bget?eum:ECUMN_4143
Escherichia coli O18:K1:H7 UTI89 (UPEC)	rafI	(GenBank) lipopolysaccharide 1,3-galactosyltransferase K03275 UDP-glucose:(glucosyl)LPS	http://www.genome.jp/dbget-bin/www_bget?eci:UTI89_C4172
Escherichia coli O25b:K100:H4-ST131 EC958 (UPEC)	rafI	(GenBank) lipopolysaccharide 1,3-galactosyltransferase K03275 UDP-glucose:(glucosyl)LPS	http://www.genome.jp/dbget-bin/www_bget?ecos:EC958_4034
Escherichia coli O26:H11 11368 (EHEC)		(GenBank) UDP-D-galactose:(glucosyl) lipopolysaccharide-alpha-1,3-D-galactosyltransferase WaaI K03275 UDP-glucose:(glucosyl)LPS	http://www.genome.jp/dbget-bin/www_bget?eoj:ECO26_4971
Escherichia coli O44:H18 042 (EAEC)	rfaI	(GenBank) UDP-galactose:(glucosyl) LPS alpha-1,3-galactosyltransferase K03275 UDP-glucose:(glucosyl)LPS	http://www.genome.jp/dbget-bin/www_bget?elo:EC042_3936
Escherichia coli O45:K1:H7 S88 (ExPEC)	waaO	(GenBank) UDP-glucose:(Glucosyl) LPS alpha1, 3-glucosyltransferase K03275 UDP-glucose:(glucosyl)LPS	http://www.genome.jp/dbget-bin/www_bget?ecz:ECS88_4043
Escherichia coli O55:H7 CB9615 (EPEC)	rfaI	(GenBank) Lipopolysaccharide 1,3-galactosyltransferase K03275 UDP-glucose:(glucosyl)LPS	http://www.genome.jp/dbget-bin/www_bget?eok:G2583_4365
Escherichia coli O55:H7 RM12579 (EPEC)		(GenBank) lipopolysaccharide 1,3-galactosyltransferase K03275 UDP-glucose:(glucosyl)LPS	http://www.genome.jp/dbget-bin/www_bget?elr:ECO55CA74_20930
Escherichia coli O6:K15:H31 536 (UPEC)		(GenBank) UDP-glucose:(glucosyl) LPS alpha1,3-glucosyltransferase WaaO K03275 UDP-glucose:(glucosyl)LPS	http://www.genome.jp/dbget-bin/www_bget?ecp:ECP_3727
Escherichia coli O6:K2:H1 CFT073 (UPEC)	rfaI	(GenBank) Lipopolysaccharide 1,3-galactosyltransferase K03275 UDP-glucose:(glucosyl)LPS	http://www.genome.jp/dbget-bin/www_bget?ecc:c4453
Escherichia coli O7:K1 CE10	rfaI	(GenBank) UDP-glucose:(Glucosyl) LPS alpha1, 3-glucosyltransferase K03275 UDP-glucose:(glucosyl)LPS	http://www.genome.jp/dbget-bin/www_bget?eoc:CE10_4186
Escherichia coli O7:K1 IAI39 (ExPEC)	waaO	(RefSeq) UDP-glucose:(Glucosyl) LPS alpha1, 3-glucosyltransferase K03275 UDP-glucose:(glucosyl)LPS	http://www.genome.jp/dbget-bin/www_bget?ect:ECIAI39_4147
Escherichia coli O17:K52:H18 UMN026 (ExPEC)	rfaI	(RefSeq) lipopolysaccharide 1,3-galactosyltransferase K03275 UDP-glucose:(glucosyl)LPS alpha-1,3-glucosyltransferase [EC:2.4.1.-]	https://www.genome.jp/dbget-bin/www_bget?eum:ECUMN_4143
Escherichia coli O78:H11:K80 H10407 (ETEC)		(GenBank) UDP-D-galactose:(glucosyl)lipopolysaccharide-alpha-1,3-D-galactosyltransferase K03275 UDP-glucose:(glucosyl)LPS	http://www.genome.jp/dbget-bin/www_bget?elh:ETEC_3870
Escherichia coli O8 IAI1 (commensal)	waaO	(GenBank) UDP-glucose:(Glucosyl) LPS alpha1, 3-glucosyltransferase K03275 UDP-glucose:(glucosyl)LPS	http://www.genome.jp/dbget-bin/www_bget?ecr:ECIAI1_3799
Escherichia coli O81 ED1a (commensal)	rfaI	(GenBank) Lipopolysaccharide 1,3-galactosyltransferase K03275 UDP-glucose:(glucosyl)LPS	http://www.genome.jp/dbget-bin/www_bget?ecq:ECED1_4312
Escherichia coli O83:H1 NRG 857C	WaaO	(RefSeq) UDP-glucose:(glucosyl) LPS alpha1,3-glucosyltransferase WaaO K03275 UDP-glucose:(glucosyl)LPS	http://www.genome.jp/dbget-bin/www_bget?eln:NRG857_18040
Escherichia coli O9 HS (commensal)	rfaI	(GenBank) lipopolysaccharide 1,3-galactosyltransferase K03275 UDP-glucose:(glucosyl)LPS	http://www.genome.jp/dbget-bin/www_bget?ecx:EcHS_A3838
Escherichia coli P12b	rfaI	(GenBank) Lipopolysaccharide 3-alpha-galactosyltransferase K03275 UDP-glucose:(glucosyl)LPS	http://www.genome.jp/dbget-bin/www_bget?elp:P12B_c3757
Escherichia coli PMV-1	rfaJ_3	(GenBank) Lipopolysaccharide 1,2-glucosyltransferase K03275 UDP-glucose:(glucosyl)LPS alpha-1,3-glucosyltransferase [EC:2.4.1.-]	http://www.genome.jp/dbget-bin/www_bget?ecoi:ECOPMV1_03962
Escherichia coli B REL606	waaO	(GenBank) UDP-glucose:(Glucosyl) LPS alpha1,3-glucosyltransferase WaaO K03275 UDP-glucose:(glucosyl)LPS alpha-1,3-glucosyltransferase [EC:2.4.1.-]	https://www.genome.jp/dbget-bin/www_bget?ebr:ECB_03486
Escherichia coli SMS-3-5 (environmental)	rfaI	(GenBank) lipopolysaccharide 1,3-galactosyltransferase K03275 UDP-glucose:(glucosyl)LPS	http://www.genome.jp/dbget-bin/www_bget?ecm:EcSMS35_3964
Escherichia coli UM146		(GenBank) UDP-glucose:(Glucosyl) LPS alpha1, 3-glucosyltransferase K03275 UDP-glucose:(glucosyl)LPS	http://www.genome.jp/dbget-bin/www_bget?elu:UM146_18300
Escherichia coli UMNK88		(GenBank) lipopolysaccharide 1,3-galactosyltransferase K03275 UDP-glucose:(glucosyl)LPS	http://www.genome.jp/dbget-bin/www_bget?eun:UMNK88_4413
Escherichia coli W	rfaI	(GenBank) lipopolysaccharide 1,3-galactosyltransferase K03275 UDP-glucose:(glucosyl)LPS	http://www.genome.jp/dbget-bin/www_bget?ell:WFL_19085
Escherichia coli W	waaO	(GenBank) lipopolysaccharide 3-alpha-galactosyltransferase K03275 UDP-glucose:(glucosyl)LPS	http://www.genome.jp/dbget-bin/www_bget?elw:ECW_m3905
Escherichia coli O3	WclR	glycosyltransferase GT1_cap1E_like	https://www.ncbi.nlm.nih.gov/protein/203285032/
Escherichia fergusonii	waaI	(GenBank) UDP-D-galactose:(glucosyl)lipopolysaccharide-alpha-1,3-D-galactosyltransferase K03275 UDP-glucose:(glucosyl)LPS	http://www.genome.jp/dbget-bin/www_bget?efe:EFER_3916
Escherichia marmotae	waaO, rfaI	(GenBank) Lipopolysaccharide 3-alpha-galactosyltransferase K03275 UDP-glucose:(glucosyl)LPS alpha-1,3-glucosyltransferase	https://www.genome.jp/dbget-bin/www_bget?ema:C1192_17495
Escherichia marmotae	gspA_1	General stress protein A	https://www.uniprot.org/uniprot/A0A370VCR8
Frischella perrara		(GenBank) Lipopolysaccharide biosynthesis protein, LPS:glycosyltransferase K03275 UDP-glucose:(glucosyl)LPS	http://www.genome.jp/dbget-bin/www_bget?fpp:FPB0191_00887
Geobacillus thermodenitrificans	RfaI	Lipopolysaccharide 1,3-galactosyltransferase	https://www.uniprot.org/uniprot/A0A1W6VNB9
Gibbsiella quercinecans		(GenBank) glycosyl transferase K03275 UDP-glucose:(glucosyl)LPS	http://www.genome.jp/dbget-bin/www_bget?gqu:AWC35_11995
Gilliamella apicola: GAPWK_0774		(GenBank) UDP-glucose:(glucosyl)lipopolysaccharide alpha-1,3-glucosyltransferase WaaO K03275 UDP-glucose:(glucosyl)LPS	http://www.genome.jp/dbget-bin/www_bget?gap:GAPWK_0774
Gilliamella apicola: GAPWK_0770		(GenBank) UDP-glucose:(glucosyl)lipopolysaccharide alpha-1,3-glucosyltransferase WaaO K03275 UDP-glucose:(glucosyl)LPS	http://www.genome.jp/dbget-bin/www_bget?gap:GAPWK_0770
Gilliamella apicola: GAPWK_0775		(GenBank) UDP-glucose:(glucosyl)lipopolysaccharide alpha-1,3-glucosyltransferase WaaO	http://www.genome.jp/dbget-bin/www_bget?gap:GAPWK_0775
Gilliamella apicola: GAPWK_0776		(GenBank) UDP-glucose:(glucosyl)lipopolysaccharide alpha-1,3-glucosyltransferase WaaO	http://www.genome.jp/dbget-bin/www_bget?gap:GAPWK_0776
Glaciimonas sp PCH181	waaO	UDP-glucose--(Glucosyl) LPS alpha 1,3-glucosyltransferase WaaO	https://www.uniprot.org/uniprot/A0A2T6FB42
Haemophilus influenzae CGSHiCZ412602	waaO	(GenBank) UDP-glucose:(glucosyl)lipopolysaccharide alpha-1,3-glucosyltransferase WaaO	http://www.genome.jp/dbget-bin/www_bget?hia:H733_0153
Hafnia alvei		(GenBank) lipopolysaccharide 1,3-galactosyltransferase K03275 UDP-glucose:(glucosyl)LPS	http://www.genome.jp/dbget-bin/www_bget?hav:AT03_01235
Hafnia paralvei		K03275 UDP-glucose:(glucosyl)LPS alpha-1,3-glucosyltransferase [EC:2.4.1.-] | (GenBank) lipopolysaccharide 3-alpha-galactosyltransferase	https://www.genome.jp/dbget-bin/www_bget?hpar:AL518_04345
Helicobacter canis	gspA_1	Lipopolysaccharide 1,3-galactosyltransferase	https://www.uniprot.org/uniprot/A0A377J1W0
Helicobacter fennelliae	gspA_1	Lipopolysaccharide 1,3-galactosyltransferase	https://www.uniprot.org/uniprot/A0A2X3BN56
Helicobacter muridarum	gspA_1	Lipopolysaccharide 1,3-galactosyltransferase	https://www.uniprot.org/uniprot/A0A377PT07
Helicobacter mustelae HMU10850		(GenBank) putative lipopolysaccharide 1,3-galactosyltransferase	https://www.genome.jp/dbget-bin/www_bget?hms:HMU10850
Helicobacter pullorum	gspA_1	Lipopolysaccharide 1,3-galactosyltransferase	https://www.uniprot.org/uniprot/A0A377PWF0
Helicobacter pylori Aklavik117		(GenBank) lipopolysaccharide 1,3-galactosyltransferase	https://www.genome.jp/dbget-bin/www_bget?hpya:HPAKL117_05175
Helicobacter typhlonius		K03278 UDP-D-galactose:(glucosyl)LPS alpha-1,3-D-galactosyltransferase [EC:2.4.1.44] | (GenBank) Glycosyl transferase family 8 family	https://www.genome.jp/dbget-bin/www_bget?hty:BN2458_PEG1166
Herbaspirillum hiltneri		(GenBank) glycosyltransferase K03275 UDP-glucose:(glucosyl)LPS	http://www.genome.jp/dbget-bin/www_bget?hht:F506_07375
Herbaspirillum rubrisubalbicans: Hrubri_3535	rfaJ	(GenBank) UDP-glucose:(glucosyl) LPS glucosyltransferase WaaO protein	https://www.genome.jp/dbget-bin/www_bget?hrb:Hrubri_3535
Herbaspirillum seropedicae SmR1: Hsero_3568	rfaJ	(GenBank) UDP-glucose:(glucosyl) LPS alpha 1,3-glucosyltransferase WaaO protein	http://www.genome.jp/dbget-bin/www_bget?hse:Hsero_3568
Herbaspirillum seropedicae SmR1: Hsero_3569	rfaJ	(GenBank) UDP-glucose:(glucosyl) LPS alpha 1,3-glucosyltransferase WaaO protein	http://www.genome.jp/dbget-bin/www_bget?hse:Hsero_3569
Herbaspirillum sp. Meg3_18910	WaaO	(GenBank) UDP-glucose--(glucosyl) LPS alpha 1,3-glucosyltransferase WaaO K03275 UDP-glucose:(glucosyl)LPS	http://www.genome.jp/dbget-bin/www_bget?hee:hmeg3_18910
Herbaspirillum sp. Meg3_18915	WaaO	(GenBank) UDP-glucose--(glucosyl) LPS alpha 1,3-glucosyltransferase WaaO	http://www.genome.jp/dbget-bin/www_bget?hee:hmeg3_18915
Klebsiella michiganensis RC10		(GenBank) lipopolysaccharide 1,3-galactosyltransferase K03275 UDP-glucose:(glucosyl)LPS	http://www.genome.jp/dbget-bin/www_bget?kmi:VW41_00230
Klebsiella pneumoniae	WaaO	UDP-glucose:(Glucosyl)lipopolysaccharide alpha-1,3-glucosyltransferase WaaO	https://www.uniprot.org/uniprot/W1B6J1
Kluyvera georgiana		(GenBank) lipopolysaccharide 1,3-galactosyltransferase K03275 UDP-glucose:(glucosyl)LPS	http://www.genome.jp/dbget-bin/www_bget?kgo:CEW81_00905
Kosakonia cowanii		K03278 UDP-D-galactose:(glucosyl)LPS alpha-1,3-D-galactosyltransferase [EC:2.4.1.44] | (GenBank) lipopolysaccharide 1,3-galactosyltransferase	https://www.genome.jp/dbget-bin/www_bget?kco:BWI95_08435
Neisseria meningitidis
Novosphingobium pentaromativorans: JI59_06665		(GenBank) galactosyltransferase	https://www.genome.jp/dbget-bin/www_bget?npn:JI59_06665
Novosphingobium sp. PP1Y: PP1Y_AT10159		(GenBank) galactosyltransferase protein	https://www.genome.jp/dbget-bin/www_bget?npp:PP1Y_AT10159
Obesumbacterium proteus		(GenBank) lipopolysaccharide 1,3-galactosyltransferase K03275 UDP-glucose:(glucosyl)LPS	http://www.genome.jp/dbget-bin/www_bget?opo:DSM2777_03190
Oxalobacter formigenes	gspA	(GenBank) General stress protein A UDP-glucose:(glucosyl)LPS alpha-1,3-glucosyltransferase [EC:2.4.1.-]	http://www.genome.jp/dbget-bin/www_bget?ofo:BRW83_2051
Palleronia marisminoris	gspA	General stress protein A	https://www.uniprot.org/uniprot/A0A1Y5SYI0
Pantoea agglomerans C410P1		(GenBank) sugar glycosyltransferase K03275 UDP-glucose:(glucosyl)LPS	http://www.genome.jp/dbget-bin/www_bget?pagc:BEE12_06385
Pantoea agglomerans FDAARGOS_160		(GenBank) sugar glycosyltransferase K03275 UDP-glucose:(glucosyl)LPS	http://www.genome.jp/dbget-bin/www_bget?pagg:AL522_04055
Pantoea vagans	rfaI	(GenBank) putative UDP-glucose:(galactosyl) LPS alpha1,2-glucosyltransferase K03275 UDP-glucose:(glucosyl)LPS	http://www.genome.jp/dbget-bin/www_bget?pva:Pvag_3186
Pectobacterium atrosepticum 21A	waaI	(GenBank) lipopolysaccharide 1,3-galactosyltransferase K03275 UDP-glucose:(glucosyl)LPS	http://www.genome.jp/dbget-bin/www_bget?pato:GZ59_01690
Pectobacterium atrosepticum JG10-08		(GenBank) lipopolysaccharide 1,3-galactosyltransferase K03275 UDP-glucose:(glucosyl)LPS	http://www.genome.jp/dbget-bin/www_bget?patr:EV46_00830
Pectobacterium atrosepticum SCRI1043	waaI	(GenBank) lipopolysaccharide 1,3-galactosyltransferase K03275 UDP-glucose:(glucosyl)LPS	http://www.genome.jp/dbget-bin/www_bget?eca:ECA0158
Pectobacterium carotovorum subsp. odoriferum		(GenBank) lipopolysaccharide 1,3-galactosyltransferase K03275 UDP-glucose:(glucosyl)LPS	http://www.genome.jp/dbget-bin/www_bget?pcv:BCS7_00615
Pectobacterium parmentieri WPP163		(GenBank) Lipopolysaccharide 3-alpha-galactosyltransferase K03275 UDP-glucose:(glucosyl)LPS	http://www.genome.jp/dbget-bin/www_bget?pwa:Pecwa_4377
Pectobacterium sp. SCC3193		(GenBank) Lipopolysaccharide 1,3-galactosyltransferase K03275 UDP-glucose:(glucosyl)LPS	http://www.genome.jp/dbget-bin/www_bget?pec:W5S_4529
Pediococcus acidilactici	WaaO	General stress protein	https://www.uniprot.org/uniprot/A0A1A5VG74
Pediococcus pentosaceus	WaaO	General stress protein	https://www.uniprot.org/uniprot/A0A1Y0VQT4
Pluralibacter gergoviae: LG71_03330		(GenBank) lipopolysaccharide 1,3-galactosyltransferase K03275 UDP-glucose:(glucosyl)LPS	http://www.genome.jp/dbget-bin/www_bget?pge:LG71_03330
Pluralibacter gergoviae: LG71_26415		(GenBank) hypothetical protein K03275 UDP-glucose:(glucosyl)LPS	http://www.genome.jp/dbget-bin/www_bget?pge:LG71_26415
Providencia alcalifaciens		(GenBank) lipopolysaccharide 1,3-galactosyltransferase K03275 UDP-glucose:(glucosyl)LPS	http://www.genome.jp/dbget-bin/www_bget?pala:CO695_04880
Providencia rettgeri: RB151_044310	gspA_1	(GenBank) General stress protein A K03275 UDP-glucose:(glucosyl)LPS	http://www.genome.jp/dbget-bin/www_bget?prg:RB151_044310
Providencia rettgeri: RB151_044340	gspA_3	(GenBank) General stress protein A K03275 UDP-glucose:(glucosyl)LPS	http://www.genome.jp/dbget-bin/www_bget?prg:RB151_044340
Providencia stuartii ATCC 33672		(GenBank) glycosyl transferase 8 family protein K03275 UDP-glucose:(glucosyl)LPS	http://www.genome.jp/dbget-bin/www_bget?psx:DR96_1046
Providencia stuartii BE2467		(GenBank) lipopolysaccharide 1,3-galactosyltransferase K03275 UDP-glucose:(glucosyl)LPS	http://www.genome.jp/dbget-bin/www_bget?psta:BGK56_13715
Providencia stuartii MRSN 2154		(GenBank) lipopolysaccharide 1,3-galactosyltransferase K03275 UDP-glucose:(glucosyl)LPS	http://www.genome.jp/dbget-bin/www_bget?psi:S70_10785
Rhizobium etli CFN 42: RHE_CH02996		(GenBank) galactosyltransferase protein	https://www.genome.jp/dbget-bin/www_bget?ret:RHE_CH02996
Rhizobium etli CIAT 652: RHECIAT_CH0003153	lpcA	(GenBank) galactosyltransferase protein	https://www.genome.jp/dbget-bin/www_bget?rec:RHECIAT_CH0003153
Rhizobium leguminosarum bv. viciae 3841: RL3440	lpcA	(GenBank) galactosyl transferase	https://www.genome.jp/dbget-bin/www_bget?rle:RL3440
Rhizobium leguminosarum bv. trifolii WSM1689: RLEG3_25565		(GenBank) galactosyltransferase	https://www.genome.jp/dbget-bin/www_bget?rlb:RLEG3_25565
Roseobacter denitrificans	RfaI	(GenBank) lipopolysaccharide 1,3-galactosyltransferase, putative	https://www.genome.jp/dbget-bin/www_bget?rde:RD1_0464
Ruminococcaceae bacterium CPB6		(GenBank) hypothetical protein K03275 UDP-glucose:(glucosyl)LPS	http://www.genome.jp/dbget-bin/www_bget?rbp:B6259_08830
Salmonella bongori	waaI	(GenBank) lipopolysaccharide 1,3-galactosyltransferase K03278 UDP-D-galactose:(glucosyl)LPS alpha-1,3-D-galactosyltransferase [EC:2.4.1.44]	https://www.genome.jp/dbget-bin/www_bget?sbg:SBG_3300
Salmonella choleraesuis	waaI	Lipopolysaccharide 1,3-galactosyltransferase	https://www.uniprot.org/uniprot/A0A379Q0E9
Salmonella diarizonae	waaI	Lipopolysaccharide 1,3-galactosyltransferase	https://www.uniprot.org/uniprot/A0A379TS11
Salmonella dublin	waaI	Lipopolysaccharide 1,3-galactosyltransferase	https://www.uniprot.org/uniprot/A0A379RH42
Salmonella enterica subsp. enterica serovar Heidelberg B182	WaaO	(GenBank) UDP-glucose:(glucosyl)lipopolysaccharide alpha-1,3-glucosyltransferase WaaO K03278 UDP-D-galactose:(glucosyl)LPS	http://www.genome.jp/dbget-bin/www_bget?shb:SU5_04195
Salmonella typhimurium	RfaI	Lipopolysaccharide 1,3-galactosyltransferase	https://www.uniprot.org/uniprot/P19816
Selenomonas ruminantium	RfaI	(GenBank) putative lipopolysaccharide 3-alpha-galactosyltransferase	https://www.genome.jp/dbget-bin/www_bget?sri:SELR_08660
Serratia marcescens
Serratia symbiotica	RfaI	(GenBank) lipopolysaccharide 1,3-galactosyltransferase K03278 UDP-D-galactose:(glucosyl)LPS alpha-1,3-D-galactosyltransferase [EC:2.4.1.44]	https://www.genome.jp/dbget-bin/www_bget?ssz:SCc_047
Shigella boydii CDC 3083-94	rfaI	(GenBank) lipopolysaccharide 1,3-galactosyltransferase K03275 UDP-glucose:(glucosyl)LPS	http://www.genome.jp/dbget-bin/www_bget?sbc:SbBS512_E4054
Shigella boydii Sb227	waaI	(GenBank) UDP-D-galactose:(glucosyl)lipopolysaccharide-alpha-1,3-D-galactosyltransferase K03275 UDP-glucose:(glucosyl)LPS	http://www.genome.jp/dbget-bin/www_bget?sbo:SBO_3631
Shigella dysenteriae 1617		(GenBank) Lipopolysaccharide 3-alpha-galactosyltransferase K03275 UDP-glucose:(glucosyl)LPS	http://www.genome.jp/dbget-bin/www_bget?sdz:Asd1617_05310
Shigella dysenteriae Sd197	rfaI	(RefSeq) lipopolysaccharide 1,3-galactosyltransferase K03275 UDP-glucose:(glucosyl)LPS	http://www.genome.jp/dbget-bin/www_bget?sdy:SDY_4059
Shigella flexneri 2002017 (serotype Fxv)		(GenBank) UDP-D-galactose:(Glucosyl)lipopolysaccharide-alpha-1,3-D-galactosyltransferase K03275 UDP-glucose:(glucosyl)LPS	http://www.genome.jp/dbget-bin/www_bget?sfe:SFxv_3995
Shigella flexneri 2003036		(GenBank) UDP-D-galactose:lipopolysaccharide-alpha-1,3-D-galactosyltransferase K03275 UDP-glucose:(glucosyl)LPS	http://www.genome.jp/dbget-bin/www_bget?sfn:SFy_5228
Shigella flexneri 2457T (serotype 2a)	waaL	(GenBank) UDP-D-galactose:(glucosyl)lipopolysaccharide-alpha-1,3-D-galactosyltransferase K03275 UDP-glucose:(glucosyl)LPS	http://www.genome.jp/dbget-bin/www_bget?sfx:S4102
Shigella flexneri 301 (serotype 2a)	waaL	(RefSeq) lipopolysaccharide 1,3-galactosyltransferase K03275 UDP-glucose:(glucosyl)LPS	http://www.genome.jp/dbget-bin/www_bget?sfl:SF3666
Shigella flexneri 8401 (serotype 5b)	waaL	(GenBank) Lipid A-core, surface polymer ligase K03275 UDP-glucose:(glucosyl)LPS	http://www.genome.jp/dbget-bin/www_bget?sfv:SFV_3902
Shigella flexneri NCTC1	rfaJ_2	(GenBank) UDP-D-galactose:(Glucosyl)lipopolysaccharide-alpha-1,3-D-galactosyltransferase,Glycosyl transferase family 8 K03275 UDP-glucose:(glucosyl)LPS	http://www.genome.jp/dbget-bin/www_bget?sft:NCTC1_03961
Shigella flexneri Shi06HN006 (serotype Yv)		(GenBank) UDP-D-galactose:lipopolysaccharide-alpha-1,3-D-galactosyltransferase K03275 UDP-glucose:(glucosyl)LPS	http://www.genome.jp/dbget-bin/www_bget?sfs:SFyv_5303
Shigella sonnei Ss046	waaI	(GenBank) UDP-D-galactose:(glucosyl)lipopolysaccharide-alpha-1,3-D-galactosyltransferase K03275 UDP-glucose:(glucosyl)LPS	http://www.genome.jp/dbget-bin/www_bget?ssn:SSON_3778
Shigella sp. PAMC 28760		(GenBank) lipopolysaccharide 1,3-galactosyltransferase K03275 UDP-glucose:(glucosyl)LPS	http://www.genome.jp/dbget-bin/www_bget?shq:A0259_22010
Shimwellia blattae	rfaI	(GenBank) lipopolysaccharide 1,3-galactosyltransferase K03275 UDP-glucose:(glucosyl)LPS	http://www.genome.jp/dbget-bin/www_bget?ebt:EBL_c39020
Sinorhizobium meliloti 2011: SM2011_b21068		(GenBank) Putative lipopolysaccharide 1,3-galactosyltransferase	https://www.genome.jp/dbget-bin/www_bget?smel:SM2011_b21068
Sphingorhabdus flavimaris		(GenBank) glycosyl transferase family 8 K03275 UDP-glucose:(glucosyl)LPS	http://www.genome.jp/dbget-bin/www_bget?sfla:SPHFLASMR4Y_00320
Streptococcus salivarius 57.I	waaI	(GenBank) family 8 glycosyl transferase	https://www.genome.jp/dbget-bin/www_bget?stf:Ssal_00686
Streptococcus pneumoniae	Cps6bl; WciN	putative galactosyl transferase	https://www.ncbi.nlm.nih.gov/protein/AAL68409
Streptococcus pneumoniae	waaI	Family 8 glycosyl transferase	https://www.uniprot.org/uniprot/A0A120ZJ40
Xenorhabdus poinarii		(GenBank) putative Lipopolysaccharide 1,3-galactosyltransferase K03275 UDP-glucose:(glucosyl)LPS	http://www.genome.jp/dbget-bin/www_bget?xpo:XPG1_0811
